# Supplementary material for: Reanalysis of multi-year high-resolution X-band weather radar observations in Hamburg
Source: Copernicus journal article supplement (doi:10.5194/essd-16-2317-2024), 2024-05-07
Supplement: Supplementary file 1 [file essd-16-2317-2024-supplement.zip]

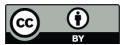

*Supplement of*

## **Reanalysis of multi-year high-resolution X-band weather radar observations in Hamburg**

**Finn Burgemeister et al.**

*Correspondence to:* Finn Burgemeister ([finn.burgemeister@uni-hamburg.de](mailto:finn.burgemeister@uni-hamburg.de))

- [essd-16-2317-2024-supplement-title-page.pdf](#)
- [essd\\_uhh\\_lawr\\_tornado\\_event.mp4](#)

The copyright of individual parts of the supplement might differ from the article licence.
